# Supplementary material
Source: ML conference proceedings conference paper supplement (https://openreview.net/forum?id=q4SiDyYQbo)
Supplement: supplementary_material [file attachment]

|            | airplane             | ship                 | automobile           | truck                | bird                 | deer                 | horse                | cat                  | dog                  | frog                 |
|------------|----------------------|----------------------|----------------------|----------------------|----------------------|----------------------|----------------------|----------------------|----------------------|----------------------|
| airplane   | 1.017<br>$\pm 0.03$  | 0.936<br>$\pm 0.013$ | 0.98<br>$\pm 0.0$    | 0.961<br>$\pm 0.008$ | 0.947<br>$\pm 0.014$ | 0.993<br>$\pm 0.004$ | 1.005<br>$\pm 0.012$ | 0.991<br>$\pm 0.004$ | 1.004<br>$\pm 0.005$ | 0.991<br>$\pm 0.005$ |
| ship       | 0.878<br>$\pm 0.0$   | 1.023<br>$\pm 0.0$   | 0.981<br>$\pm 0.0$   | 0.957<br>$\pm 0.0$   | 0.978<br>$\pm 0.0$   | 0.991<br>$\pm 0.0$   | 0.992<br>$\pm 0.0$   | 0.982<br>$\pm 0.0$   | 0.99<br>$\pm 0.0$    | 0.988<br>$\pm 0.0$   |
| automobile | 0.952<br>$\pm 0.01$  | 0.973<br>$\pm 0.014$ | 0.881<br>$\pm 0.015$ | 0.834<br>$\pm 0.025$ | 1.004<br>$\pm 0.008$ | 1.003<br>$\pm 0.009$ | 1.011<br>$\pm 0.013$ | 1.013<br>$\pm 0.008$ | 1.009<br>$\pm 0.008$ | 1.001<br>$\pm 0.007$ |
| truck      | 0.997<br>$\pm 0.0$   | 0.945<br>$\pm 0.0$   | 0.882<br>$\pm 0.0$   | 0.701<br>$\pm 0.0$   | 1.01<br>$\pm 0.0$    | 0.959<br>$\pm 0.0$   | 1.002<br>$\pm 0.0$   | 0.986<br>$\pm 0.0$   | 0.993<br>$\pm 0.0$   | 0.967<br>$\pm 0.0$   |
| bird       | 0.967<br>$\pm 0.011$ | 1.002<br>$\pm 0.003$ | 1.006<br>$\pm 0.005$ | 1.026<br>$\pm 0.017$ | 1.052<br>$\pm 0.004$ | 0.965<br>$\pm 0.008$ | 0.971<br>$\pm 0.006$ | 0.948<br>$\pm 0.006$ | 0.948<br>$\pm 0.003$ | 0.97<br>$\pm 0.005$  |
| deer       | 0.989<br>$\pm 0.004$ | 0.999<br>$\pm 0.005$ | 1.004<br>$\pm 0.008$ | 0.985<br>$\pm 0.004$ | 0.953<br>$\pm 0.006$ | 1.058<br>$\pm 0.015$ | 0.952<br>$\pm 0.018$ | 0.951<br>$\pm 0.013$ | 0.953<br>$\pm 0.014$ | 0.965<br>$\pm 0.022$ |
| horse      | 0.982<br>$\pm 0.0$   | 1.007<br>$\pm 0.0$   | 1.004<br>$\pm 0.0$   | 1.007<br>$\pm 0.0$   | 0.963<br>$\pm 0.0$   | 0.89<br>$\pm 0.0$    | 1.02<br>$\pm 0.0$    | 0.959<br>$\pm 0.0$   | 0.968<br>$\pm 0.0$   | 0.977<br>$\pm 0.0$   |
| cat        | 0.99<br>$\pm 0.014$  | 1.012<br>$\pm 0.017$ | 1.004<br>$\pm 0.004$ | 1.019<br>$\pm 0.019$ | 0.973<br>$\pm 0.004$ | 0.974<br>$\pm 0.001$ | 0.971<br>$\pm 0.002$ | 1.024<br>$\pm 0.013$ | 0.955<br>$\pm 0.015$ | 0.951<br>$\pm 0.015$ |
| dog        | 0.995<br>$\pm 0.012$ | 1.015<br>$\pm 0.009$ | 1.009<br>$\pm 0.0$   | 1.04<br>$\pm 0.014$  | 0.971<br>$\pm 0.002$ | 0.994<br>$\pm 0.007$ | 0.984<br>$\pm 0.0$   | 0.921<br>$\pm 0.011$ | 0.921<br>$\pm 0.0$   | 0.96<br>$\pm 0.017$  |
| frog       | 0.997<br>$\pm 0.022$ | 1.012<br>$\pm 0.036$ | 1.017<br>$\pm 0.027$ | 0.977<br>$\pm 0.01$  | 0.925<br>$\pm 0.022$ | 0.91<br>$\pm 0.031$  | 0.972<br>$\pm 0.004$ | 0.86<br>$\pm 0.06$   | 0.924<br>$\pm 0.039$ | 0.789<br>$\pm 0.079$ |
