# Supplementary material
Source: ML conference proceedings conference paper supplement (https://openreview.net/forum?id=q4SiDyYQbo)
Supplement: supplementary_material [file attachment]

|            |                       |                       |                       |                       |                       |                       |
|------------|-----------------------|-----------------------|-----------------------|-----------------------|-----------------------|-----------------------|
| airplane   | -0.079<br>$\pm 0.001$ | 0.024<br>$\pm 0.0$    | 0.007<br>$\pm 0.0$    | 0.012<br>$\pm 0.001$  | 0.001<br>$\pm 0.0$    | 0.005<br>$\pm 0.0$    |
| ship       | 0.019<br>$\pm 0.001$  | -0.044<br>$\pm 0.001$ | 0.007<br>$\pm 0.0$    | 0.004<br>$\pm 0.001$  | 0.0<br>$\pm 0.0$      | 0.003<br>$\pm 0.0$    |
| automobile | 0.013<br>$\pm 0.001$  | 0.008<br>$\pm 0.0$    | -0.053<br>$\pm 0.002$ | 0.022<br>$\pm 0.001$  | 0.0<br>$\pm 0.0$      | 0.0<br>$\pm 0.0$      |
| truck      | 0.013<br>$\pm 0.0$    | 0.002<br>$\pm 0.001$  | 0.012<br>$\pm 0.001$  | -0.037<br>$\pm 0.001$ | 0.002<br>$\pm 0.0$    | 0.003<br>$\pm 0.0$    |
| deer       | 0.02<br>$\pm 0.001$   | -0.001<br>$\pm 0.0$   | 0.001<br>$\pm 0.0$    | 0.0<br>$\pm 0.0$      | -0.091<br>$\pm 0.001$ | 0.036<br>$\pm 0.001$  |
| horse      | -0.001<br>$\pm 0.0$   | 0.002<br>$\pm 0.0$    | 0.0<br>$\pm 0.0$      | 0.003<br>$\pm 0.0$    | 0.017<br>$\pm 0.001$  | -0.043<br>$\pm 0.001$ |
|            | airplane              | ship                  | automobile            | truck                 | deer                  | horse                 |
