# Supplementary material
Source: ML conference proceedings conference paper supplement (https://openreview.net/forum?id=q4SiDyYQbo)
Supplement: supplementary_material [file attachment]

|            | airplane        | ship            | automobile      | truck           | bird            | deer            | horse           | cat             | dog             | frog            |
|------------|-----------------|-----------------|-----------------|-----------------|-----------------|-----------------|-----------------|-----------------|-----------------|-----------------|
| airplane   | 1.016<br>±0.004 | 0.969<br>±0.001 | 0.973<br>±0.001 | 0.976<br>±0.001 | 0.956<br>±0.002 | 0.971<br>±0.0   | 0.975<br>±0.001 | 0.965<br>±0.001 | 0.968<br>±0.001 | 0.984<br>±0.001 |
| ship       | 0.912<br>±0.001 | 1.043<br>±0.001 | 0.929<br>±0.001 | 0.921<br>±0.003 | 0.941<br>±0.003 | 0.95<br>±0.002  | 0.954<br>±0.002 | 0.944<br>±0.001 | 0.953<br>±0.001 | 0.966<br>±0.001 |
| automobile | 0.895<br>±0.004 | 0.875<br>±0.001 | 0.965<br>±0.001 | 0.829<br>±0.001 | 0.928<br>±0.001 | 0.933<br>±0.005 | 0.927<br>±0.005 | 0.913<br>±0.005 | 0.923<br>±0.003 | 0.942<br>±0.004 |
| truck      | 0.944<br>±0.002 | 0.914<br>±0.01  | 0.897<br>±0.001 | 0.977<br>±0.006 | 0.963<br>±0.001 | 0.95<br>±0.002  | 0.948<br>±0.004 | 0.947<br>±0.004 | 0.958<br>±0.004 | 0.973<br>±0.001 |
| bird       | 0.969<br>±0.001 | 0.972<br>±0.001 | 0.97<br>±0.003  | 0.976<br>±0.001 | 0.989<br>±0.002 | 0.962<br>±0.001 | 0.968<br>±0.001 | 0.944<br>±0.0   | 0.951<br>±0.001 | 0.946<br>±0.004 |
| deer       | 0.983<br>±0.001 | 0.969<br>±0.004 | 0.975<br>±0.001 | 0.974<br>±0.004 | 0.964<br>±0.002 | 1.06<br>±0.003  | 0.972<br>±0.001 | 0.952<br>±0.001 | 0.952<br>±0.001 | 0.951<br>±0.001 |
| horse      | 0.946<br>±0.002 | 0.945<br>±0.003 | 0.963<br>±0.005 | 0.947<br>±0.004 | 0.919<br>±0.002 | 0.886<br>±0.001 | 0.965<br>±0.002 | 0.915<br>±0.002 | 0.925<br>±0.003 | 0.931<br>±0.001 |
| cat        | 0.987<br>±0.0   | 0.981<br>±0.002 | 0.984<br>±0.003 | 0.986<br>±0.003 | 0.973<br>±0.001 | 0.969<br>±0.002 | 0.983<br>±0.002 | 0.992<br>±0.001 | 0.991<br>±0.004 | 0.967<br>±0.002 |
| dog        | 0.973<br>±0.002 | 0.978<br>±0.002 | 0.979<br>±0.001 | 0.982<br>±0.002 | 0.951<br>±0.002 | 0.964<br>±0.001 | 0.973<br>±0.0   | 0.936<br>±0.003 | 0.94<br>±0.003  | 0.96<br>±0.0    |
| frog       | 0.981<br>±0.003 | 0.987<br>±0.002 | 0.997<br>±0.002 | 0.988<br>±0.004 | 0.943<br>±0.001 | 0.914<br>±0.001 | 0.97<br>±0.003  | 0.929<br>±0.002 | 0.951<br>±0.0   | 1.04<br>±0.0    |
