# Supplementary material
Source: ML conference proceedings conference paper supplement (https://openreview.net/forum?id=q4SiDyYQbo)
Supplement: supplementary_material [file attachment]

TE

|            |                       |                      |                       |                      |                       |                      |
|------------|-----------------------|----------------------|-----------------------|----------------------|-----------------------|----------------------|
| airplane   | -0.951<br>$\pm 0.001$ | 0.29<br>$\pm 0.002$  | 0.022<br>$\pm 0.001$  | 0.082<br>$\pm 0.001$ | 0.032<br>$\pm 0.001$  | 0.019<br>$\pm 0.001$ |
| ship       | 0.681<br>$\pm 0.002$  | -0.972<br>$\pm 0.0$  | 0.093<br>$\pm 0.001$  | 0.121<br>$\pm 0.002$ | 0.003<br>$\pm 0.0$    | 0.005<br>$\pm 0.0$   |
| automobile | 0.056<br>$\pm 0.002$  | 0.099<br>$\pm 0.002$ | -0.972<br>$\pm 0.001$ | 0.798<br>$\pm 0.002$ | 0.002<br>$\pm 0.0$    | 0.0<br>$\pm 0.0$     |
| truck      | 0.091<br>$\pm 0.002$  | 0.175<br>$\pm 0.003$ | 0.647<br>$\pm 0.004$  | -0.955<br>$\pm 0.0$  | 0.0<br>$\pm 0.0$      | 0.007<br>$\pm 0.0$   |
| deer       | 0.024<br>$\pm 0.001$  | 0.004<br>$\pm 0.0$   | 0.001<br>$\pm 0.0$    | 0.002<br>$\pm 0.0$   | -0.907<br>$\pm 0.001$ | 0.238<br>$\pm 0.001$ |
| horse      | 0.035<br>$\pm 0.001$  | 0.003<br>$\pm 0.0$   | 0.001<br>$\pm 0.0$    | 0.007<br>$\pm 0.0$   | 0.571<br>$\pm 0.002$  | -0.952<br>$\pm 0.0$  |
|            | airplane              | ship                 | automobile            | truck                | deer                  | horse                |

-rNDE

|            |                      |                       |                       |                       |                       |                       |
|------------|----------------------|-----------------------|-----------------------|-----------------------|-----------------------|-----------------------|
| airplane   | -0.86<br>$\pm 0.001$ | 0.258<br>$\pm 0.002$  | 0.021<br>$\pm 0.001$  | 0.073<br>$\pm 0.001$  | 0.023<br>$\pm 0.001$  | 0.017<br>$\pm 0.001$  |
| ship       | 0.625<br>$\pm 0.003$ | -0.855<br>$\pm 0.001$ | 0.077<br>$\pm 0.001$  | 0.102<br>$\pm 0.002$  | 0.001<br>$\pm 0.0$    | 0.003<br>$\pm 0.0$    |
| automobile | 0.046<br>$\pm 0.002$ | 0.084<br>$\pm 0.002$  | -0.877<br>$\pm 0.002$ | 0.736<br>$\pm 0.002$  | 0.0<br>$\pm 0.0$      | 0.0<br>$\pm 0.0$      |
| truck      | 0.074<br>$\pm 0.002$ | 0.167<br>$\pm 0.003$  | 0.602<br>$\pm 0.004$  | -0.875<br>$\pm 0.001$ | 0.0<br>$\pm 0.0$      | 0.007<br>$\pm 0.0$    |
| deer       | 0.012<br>$\pm 0.001$ | 0.002<br>$\pm 0.0$    | 0.0<br>$\pm 0.0$      | 0.001<br>$\pm 0.0$    | -0.752<br>$\pm 0.001$ | 0.183<br>$\pm 0.002$  |
| horse      | 0.03<br>$\pm 0.001$  | 0.002<br>$\pm 0.0$    | 0.001<br>$\pm 0.0$    | 0.006<br>$\pm 0.0$    | 0.515<br>$\pm 0.002$  | -0.824<br>$\pm 0.002$ |
|            | airplane             | ship                  | automobile            | truck                 | deer                  | horse                 |

NIE

|            |                       |                       |                       |                       |                       |                       |
|------------|-----------------------|-----------------------|-----------------------|-----------------------|-----------------------|-----------------------|
| airplane   | -0.091<br>$\pm 0.001$ | 0.032<br>$\pm 0.001$  | 0.001<br>$\pm 0.0$    | 0.009<br>$\pm 0.0$    | 0.009<br>$\pm 0.001$  | 0.001<br>$\pm 0.0$    |
| ship       | 0.056<br>$\pm 0.001$  | -0.118<br>$\pm 0.001$ | 0.016<br>$\pm 0.0$    | 0.019<br>$\pm 0.0$    | 0.002<br>$\pm 0.0$    | 0.001<br>$\pm 0.0$    |
| automobile | 0.01<br>$\pm 0.001$   | 0.015<br>$\pm 0.001$  | -0.095<br>$\pm 0.002$ | 0.062<br>$\pm 0.001$  | 0.002<br>$\pm 0.0$    | 0.0<br>$\pm 0.0$      |
| truck      | 0.017<br>$\pm 0.0$    | 0.009<br>$\pm 0.001$  | 0.045<br>$\pm 0.001$  | -0.079<br>$\pm 0.001$ | 0.0<br>$\pm 0.0$      | 0.001<br>$\pm 0.0$    |
| deer       | 0.012<br>$\pm 0.0$    | 0.002<br>$\pm 0.0$    | 0.001<br>$\pm 0.0$    | 0.001<br>$\pm 0.0$    | -0.155<br>$\pm 0.002$ | 0.055<br>$\pm 0.001$  |
| horse      | 0.004<br>$\pm 0.0$    | 0.001<br>$\pm 0.0$    | 0.001<br>$\pm 0.0$    | 0.001<br>$\pm 0.0$    | 0.056<br>$\pm 0.001$  | -0.128<br>$\pm 0.002$ |
|            | airplane              | ship                  | automobile            | truck                 | deer                  | horse                 |
