# Supplementary material
Source: ML conference proceedings conference paper supplement (https://openreview.net/forum?id=q4SiDyYQbo)
Supplement: supplementary_material [file attachment]

TE

|            |                      |                       |                      |                       |                       |                      |
|------------|----------------------|-----------------------|----------------------|-----------------------|-----------------------|----------------------|
| airplane   | -0.75<br>$\pm 0.002$ | 0.269<br>$\pm 0.001$  | 0.022<br>$\pm 0.0$   | 0.06<br>$\pm 0.0$     | 0.028<br>$\pm 0.001$  | 0.014<br>$\pm 0.001$ |
| ship       | 0.764<br>$\pm 0.001$ | -0.955<br>$\pm 0.001$ | 0.062<br>$\pm 0.001$ | 0.089<br>$\pm 0.001$  | 0.0<br>$\pm 0.0$      | 0.004<br>$\pm 0.0$   |
| automobile | 0.06<br>$\pm 0.001$  | 0.054<br>$\pm 0.001$  | -0.64<br>$\pm 0.001$ | 0.511<br>$\pm 0.001$  | 0.0<br>$\pm 0.0$      | 0.0<br>$\pm 0.0$     |
| truck      | 0.049<br>$\pm 0.0$   | 0.043<br>$\pm 0.001$  | 0.3<br>$\pm 0.003$   | -0.406<br>$\pm 0.003$ | 0.0<br>$\pm 0.0$      | 0.001<br>$\pm 0.0$   |
| deer       | 0.018<br>$\pm 0.0$   | 0.002<br>$\pm 0.0$    | 0.001<br>$\pm 0.0$   | 0.001<br>$\pm 0.0$    | -0.857<br>$\pm 0.001$ | 0.226<br>$\pm 0.001$ |
| horse      | 0.025<br>$\pm 0.001$ | 0.001<br>$\pm 0.0$    | 0.001<br>$\pm 0.0$   | 0.003<br>$\pm 0.0$    | 0.567<br>$\pm 0.001$  | -0.91<br>$\pm 0.001$ |
|            | airplane             | ship                  | automobile           | truck                 | deer                  | horse                |

-rNDE

|            |                       |                       |                       |                       |                       |                       |
|------------|-----------------------|-----------------------|-----------------------|-----------------------|-----------------------|-----------------------|
| airplane   | -0.632<br>$\pm 0.002$ | 0.233<br>$\pm 0.001$  | 0.015<br>$\pm 0.0$    | 0.044<br>$\pm 0.0$    | 0.015<br>$\pm 0.001$  | 0.014<br>$\pm 0.001$  |
| ship       | 0.691<br>$\pm 0.001$  | -0.814<br>$\pm 0.001$ | 0.038<br>$\pm 0.001$  | 0.067<br>$\pm 0.001$  | 0.0<br>$\pm 0.0$      | 0.001<br>$\pm 0.0$    |
| automobile | 0.05<br>$\pm 0.002$   | 0.045<br>$\pm 0.001$  | -0.566<br>$\pm 0.002$ | 0.465<br>$\pm 0.001$  | 0.0<br>$\pm 0.0$      | 0.0<br>$\pm 0.0$      |
| truck      | 0.04<br>$\pm 0.001$   | 0.035<br>$\pm 0.001$  | 0.273<br>$\pm 0.003$  | -0.356<br>$\pm 0.003$ | 0.0<br>$\pm 0.0$      | 0.001<br>$\pm 0.0$    |
| deer       | 0.004<br>$\pm 0.0$    | 0.002<br>$\pm 0.0$    | 0.0<br>$\pm 0.0$      | 0.001<br>$\pm 0.0$    | -0.704<br>$\pm 0.002$ | 0.166<br>$\pm 0.001$  |
| horse      | 0.021<br>$\pm 0.001$  | 0.0<br>$\pm 0.0$      | 0.001<br>$\pm 0.0$    | 0.001<br>$\pm 0.0$    | 0.512<br>$\pm 0.001$  | -0.779<br>$\pm 0.001$ |
|            | airplane              | ship                  | automobile            | truck                 | deer                  | horse                 |

NIE

|            |                       |                      |                       |                      |                       |                       |
|------------|-----------------------|----------------------|-----------------------|----------------------|-----------------------|-----------------------|
| airplane   | -0.118<br>$\pm 0.001$ | 0.037<br>$\pm 0.001$ | 0.007<br>$\pm 0.0$    | 0.016<br>$\pm 0.0$   | 0.013<br>$\pm 0.001$  | 0.001<br>$\pm 0.0$    |
| ship       | 0.073<br>$\pm 0.001$  | -0.14<br>$\pm 0.001$ | 0.024<br>$\pm 0.0$    | 0.022<br>$\pm 0.001$ | 0.0<br>$\pm 0.0$      | 0.003<br>$\pm 0.0$    |
| automobile | 0.01<br>$\pm 0.001$   | 0.01<br>$\pm 0.001$  | -0.073<br>$\pm 0.002$ | 0.046<br>$\pm 0.001$ | 0.0<br>$\pm 0.0$      | 0.0<br>$\pm 0.0$      |
| truck      | 0.009<br>$\pm 0.0$    | 0.008<br>$\pm 0.001$ | 0.026<br>$\pm 0.001$  | -0.05<br>$\pm 0.001$ | 0.0<br>$\pm 0.0$      | 0.001<br>$\pm 0.0$    |
| deer       | 0.014<br>$\pm 0.0$    | 0.0<br>$\pm 0.0$     | 0.001<br>$\pm 0.0$    | 0.0<br>$\pm 0.0$     | -0.153<br>$\pm 0.001$ | 0.059<br>$\pm 0.001$  |
| horse      | 0.004<br>$\pm 0.0$    | 0.001<br>$\pm 0.0$   | 0.001<br>$\pm 0.0$    | 0.001<br>$\pm 0.0$   | 0.054<br>$\pm 0.001$  | -0.131<br>$\pm 0.001$ |
|            | airplane              | ship                 | automobile            | truck                | deer                  | horse                 |
