# Supplementary material
Source: ML conference proceedings conference paper supplement (https://openreview.net/forum?id=q4SiDyYQbo)
Supplement: supplementary_material [file attachment]

|            |                      |                      |                      |                      |                      |                      |
|------------|----------------------|----------------------|----------------------|----------------------|----------------------|----------------------|
| airplane   | 1.016<br>$\pm 0.004$ | 0.969<br>$\pm 0.001$ | 0.973<br>$\pm 0.001$ | 0.976<br>$\pm 0.001$ | 0.971<br>$\pm 0.0$   | 0.975<br>$\pm 0.001$ |
| ship       | 0.912<br>$\pm 0.001$ | 1.043<br>$\pm 0.001$ | 0.929<br>$\pm 0.001$ | 0.921<br>$\pm 0.003$ | 0.95<br>$\pm 0.002$  | 0.954<br>$\pm 0.002$ |
| automobile | 0.895<br>$\pm 0.004$ | 0.875<br>$\pm 0.001$ | 0.965<br>$\pm 0.001$ | 0.829<br>$\pm 0.001$ | 0.933<br>$\pm 0.005$ | 0.927<br>$\pm 0.005$ |
| truck      | 0.944<br>$\pm 0.002$ | 0.914<br>$\pm 0.01$  | 0.897<br>$\pm 0.001$ | 0.977<br>$\pm 0.006$ | 0.95<br>$\pm 0.002$  | 0.948<br>$\pm 0.004$ |
| deer       | 0.983<br>$\pm 0.001$ | 0.969<br>$\pm 0.004$ | 0.975<br>$\pm 0.001$ | 0.974<br>$\pm 0.004$ | 1.06<br>$\pm 0.003$  | 0.972<br>$\pm 0.001$ |
| horse      | 0.946<br>$\pm 0.002$ | 0.945<br>$\pm 0.003$ | 0.963<br>$\pm 0.005$ | 0.947<br>$\pm 0.004$ | 0.886<br>$\pm 0.001$ | 0.965<br>$\pm 0.002$ |
|            | airplane             | ship                 | automobile           | truck                | deer                 | horse                |
