# Supplementary material
Source: ML conference proceedings conference paper supplement (https://openreview.net/forum?id=q4SiDyYQbo)
Supplement: supplementary_material [file attachment]

|            |                      |                      |                      |                      |                      |                      |                      |                      |                      |                      |
|------------|----------------------|----------------------|----------------------|----------------------|----------------------|----------------------|----------------------|----------------------|----------------------|----------------------|
| airplane   | 1.154<br>$\pm 0.011$ | 0.994<br>$\pm 0.004$ | 0.955<br>$\pm 0.015$ | 0.966<br>$\pm 0.011$ | 0.925<br>$\pm 0.006$ | 0.964<br>$\pm 0.006$ | 0.967<br>$\pm 0.008$ | 0.957<br>$\pm 0.006$ | 0.97<br>$\pm 0.004$  | 0.982<br>$\pm 0.009$ |
| ship       | 0.802<br>$\pm 0.009$ | 1.03<br>$\pm 0.012$  | 0.915<br>$\pm 0.003$ | 0.918<br>$\pm 0.011$ | 0.958<br>$\pm 0.008$ | 0.985<br>$\pm 0.01$  | 0.988<br>$\pm 0.004$ | 0.973<br>$\pm 0.005$ | 0.982<br>$\pm 0.0$   | 0.992<br>$\pm 0.001$ |
| automobile | 0.808<br>$\pm 0.01$  | 0.779<br>$\pm 0.013$ | 0.777<br>$\pm 0.01$  | 0.714<br>$\pm 0.011$ | 0.991<br>$\pm 0.002$ | 1.003<br>$\pm 0.005$ | 0.987<br>$\pm 0.002$ | 1.008<br>$\pm 0.004$ | 1.008<br>$\pm 0.002$ | 1.009<br>$\pm 0.013$ |
| truck      | 0.886<br>$\pm 0.012$ | 0.852<br>$\pm 0.001$ | 0.801<br>$\pm 0.022$ | 0.749<br>$\pm 0.006$ | 0.977<br>$\pm 0.003$ | 0.996<br>$\pm 0.01$  | 0.975<br>$\pm 0.003$ | 0.98<br>$\pm 0.012$  | 0.983<br>$\pm 0.005$ | 0.985<br>$\pm 0.006$ |
| bird       | 0.969<br>$\pm 0.004$ | 1.01<br>$\pm 0.01$   | 1.027<br>$\pm 0.003$ | 1.025<br>$\pm 0.006$ | 1.035<br>$\pm 0.001$ | 0.949<br>$\pm 0.0$   | 0.961<br>$\pm 0.004$ | 0.924<br>$\pm 0.001$ | 0.932<br>$\pm 0.003$ | 0.936<br>$\pm 0.002$ |
| deer       | 0.971<br>$\pm 0.003$ | 0.997<br>$\pm 0.001$ | 1.015<br>$\pm 0.002$ | 1.009<br>$\pm 0.004$ | 0.934<br>$\pm 0.001$ | 1.078<br>$\pm 0.008$ | 0.934<br>$\pm 0.005$ | 0.92<br>$\pm 0.005$  | 0.924<br>$\pm 0.007$ | 0.897<br>$\pm 0.004$ |
| horse      | 0.993<br>$\pm 0.005$ | 1.021<br>$\pm 0.003$ | 1.017<br>$\pm 0.001$ | 1.009<br>$\pm 0.006$ | 0.927<br>$\pm 0.006$ | 0.827<br>$\pm 0.003$ | 1.037<br>$\pm 0.005$ | 0.911<br>$\pm 0.002$ | 0.913<br>$\pm 0.004$ | 0.937<br>$\pm 0.007$ |
| cat        | 0.981<br>$\pm 0.013$ | 0.996<br>$\pm 0.004$ | 1.013<br>$\pm 0.006$ | 1.0<br>$\pm 0.003$   | 0.943<br>$\pm 0.006$ | 0.937<br>$\pm 0.009$ | 0.972<br>$\pm 0.005$ | 1.007<br>$\pm 0.003$ | 0.943<br>$\pm 0.003$ | 0.922<br>$\pm 0.013$ |
| dog        | 0.984<br>$\pm 0.007$ | 0.998<br>$\pm 0.012$ | 1.006<br>$\pm 0.002$ | 1.008<br>$\pm 0.005$ | 0.917<br>$\pm 0.003$ | 0.943<br>$\pm 0.002$ | 0.963<br>$\pm 0.011$ | 0.885<br>$\pm 0.013$ | 0.915<br>$\pm 0.013$ | 0.915<br>$\pm 0.008$ |
| frog       | 0.993<br>$\pm 0.005$ | 1.006<br>$\pm 0.006$ | 1.007<br>$\pm 0.013$ | 1.01<br>$\pm 0.011$  | 0.876<br>$\pm 0.007$ | 0.844<br>$\pm 0.007$ | 0.953<br>$\pm 0.013$ | 0.843<br>$\pm 0.009$ | 0.896<br>$\pm 0.008$ | 0.957<br>$\pm 0.008$ |
|            | airplane             | ship                 | automobile           | truck                | bird                 | deer                 | horse                | cat                  | dog                  | frog                 |
