# Supplementary material
Source: ML conference proceedings conference paper supplement (https://openreview.net/forum?id=q4SiDyYQbo)
Supplement: supplementary_material [file attachment]

TE

|            |          |        |            |        |        |        |        |        |        |        |
|------------|----------|--------|------------|--------|--------|--------|--------|--------|--------|--------|
| airplane   | -0.755   | 0.266  | 0.019      | 0.062  | 0.294  | 0.03   | 0.013  | 0.047  | 0.002  | 0.021  |
|            | ±0.002   | ±0.001 | ±0.0       | ±0.0   | ±0.002 | ±0.001 | ±0.001 | ±0.001 | ±0.0   | ±0.0   |
| ship       | 0.764    | -0.955 | 0.062      | 0.091  | 0.006  | 0.0    | 0.004  | 0.023  | 0.001  | 0.004  |
|            | ±0.001   | ±0.001 | ±0.001     | ±0.001 | ±0.0   | ±0.0   | ±0.0   | ±0.0   | ±0.0   | ±0.0   |
| automobile | 0.058    | 0.055  | -0.655     | 0.529  | 0.001  | 0.0    | 0.0    | 0.003  | 0.001  | 0.008  |
|            | ±0.002   | ±0.001 | ±0.002     | ±0.001 | ±0.0   | ±0.0   | ±0.0   | ±0.0   | ±0.0   | ±0.0   |
| truck      | 0.051    | 0.047  | 0.287      | -0.398 | 0.003  | 0.0    | 0.001  | 0.009  | 0.0    | 0.0    |
|            | ±0.001   | ±0.001 | ±0.002     | ±0.002 | ±0.0   | ±0.0   | ±0.0   | ±0.0   | ±0.0   | ±0.0   |
| bird       | 0.133    | 0.001  | 0.003      | 0.003  | -0.797 | 0.162  | 0.038  | 0.179  | 0.059  | 0.218  |
|            | ±0.001   | ±0.0   | ±0.0       | ±0.0   | ±0.002 | ±0.001 | ±0.001 | ±0.002 | ±0.001 | ±0.002 |
| deer       | 0.018    | 0.002  | 0.001      | 0.001  | 0.377  | -0.868 | 0.232  | 0.068  | 0.105  | 0.065  |
|            | ±0.0     | ±0.0   | ±0.0       | ±0.0   | ±0.002 | ±0.001 | ±0.001 | ±0.001 | ±0.001 | ±0.001 |
| horse      | 0.027    | 0.001  | 0.001      | 0.003  | 0.056  | 0.571  | -0.924 | 0.097  | 0.162  | 0.008  |
|            | ±0.001   | ±0.0   | ±0.0       | ±0.0   | ±0.0   | ±0.001 | ±0.001 | ±0.001 | ±0.001 | ±0.0   |
| cat        | 0.01     | 0.009  | 0.005      | 0.01   | 0.07   | 0.044  | 0.021  | -0.741 | 0.421  | 0.151  |
|            | ±0.001   | ±0.0   | ±0.0       | ±0.0   | ±0.001 | ±0.001 | ±0.0   | ±0.001 | ±0.002 | ±0.001 |
| dog        | 0.003    | 0.001  | 0.0        | -0.001 | 0.043  | 0.015  | 0.049  | 0.64   | -0.761 | 0.011  |
|            | ±0.0     | ±0.0   | ±0.0       | ±0.0   | ±0.001 | ±0.0   | ±0.001 | ±0.002 | ±0.001 | ±0.0   |
| frog       | 0.011    | 0.009  | 0.001      | 0.001  | 0.344  | 0.091  | 0.001  | 0.281  | 0.009  | -0.747 |
|            | ±0.0     | ±0.0   | ±0.0       | ±0.0   | ±0.003 | ±0.001 | ±0.0   | ±0.002 | ±0.0   | ±0.005 |
|            | airplane | ship   | automobile | truck  | bird   | deer   | horse  | cat    | dog    | frog   |

NIE

|          |        |            |        |        |        |        |        |        |        |
|----------|--------|------------|--------|--------|--------|--------|--------|--------|--------|
| -0.118   | 0.037  | 0.007      | 0.016  | 0.022  | 0.013  | 0.001  | 0.011  | 0.002  | 0.01   |
| ±0.001   | ±0.001 | ±0.0       | ±0.0   | ±0.0   | ±0.001 | ±0.0   | ±0.0   | ±0.0   | ±0.0   |
| 0.073    | -0.14  | 0.024      | 0.022  | 0.005  | 0.0    | 0.003  | 0.011  | 0.001  | 0.002  |
| ±0.001   | ±0.001 | ±0.0       | ±0.001 | ±0.0   | ±0.0   | ±0.0   | ±0.0   | ±0.0   | ±0.0   |
| 0.01     | 0.01   | -0.073     | 0.046  | 0.001  | 0.0    | 0.0    | 0.001  | 0.001  | 0.004  |
| ±0.001   | ±0.001 | ±0.002     | ±0.001 | ±0.0   | ±0.0   | ±0.0   | ±0.0   | ±0.0   | ±0.0   |
| 0.009    | 0.008  | 0.026      | -0.05  | 0.001  | 0.0    | 0.001  | 0.005  | 0.0    | 0.0    |
| ±0.0     | ±0.001 | ±0.001     | ±0.001 | ±0.0   | ±0.0   | ±0.0   | ±0.0   | ±0.0   | ±0.0   |
| 0.021    | 0.001  | 0.003      | 0.002  | -0.166 | 0.052  | 0.002  | 0.035  | 0.024  | 0.026  |
| ±0.001   | ±0.0   | ±0.0       | ±0.0   | ±0.002 | ±0.001 | ±0.0   | ±0.001 | ±0.001 | ±0.001 |
| 0.014    | 0.0    | 0.001      | 0.0    | 0.025  | -0.153 | 0.059  | 0.015  | 0.01   | 0.029  |
| ±0.0     | ±0.0   | ±0.0       | ±0.0   | ±0.001 | ±0.001 | ±0.001 | ±0.001 | ±0.0   | ±0.001 |
| 0.004    | 0.001  | 0.001      | 0.001  | 0.019  | 0.054  | -0.131 | 0.032  | 0.015  | 0.004  |
| ±0.0     | ±0.0   | ±0.0       | ±0.0   | ±0.001 | ±0.001 | ±0.001 | ±0.0   | ±0.001 | ±0.0   |
| 0.008    | 0.003  | 0.002      | 0.005  | 0.022  | 0.011  | 0.005  | -0.116 | 0.031  | 0.029  |
| ±0.001   | ±0.0   | ±0.0       | ±0.0   | ±0.001 | ±0.001 | ±0.0   | ±0.002 | ±0.002 | ±0.001 |
| 0.003    | 0.001  | 0.0        | -0.001 | 0.013  | 0.003  | 0.01   | 0.022  | -0.058 | 0.007  |
| ±0.0     | ±0.0   | ±0.0       | ±0.0   | ±0.001 | ±0.0   | ±0.001 | ±0.002 | ±0.002 | ±0.0   |
| 0.007    | 0.005  | 0.0        | 0.001  | 0.03   | 0.018  | 0.001  | 0.043  | 0.005  | -0.109 |
| ±0.0     | ±0.0   | ±0.0       | ±0.0   | ±0.001 | ±0.0   | ±0.0   | ±0.001 | ±0.0   | ±0.001 |
| airplane | ship   | automobile | truck  | bird   | deer   | horse  | cat    | dog    | frog   |
