# Supplementary material
Source: ML conference proceedings conference paper supplement (https://openreview.net/forum?id=q4SiDyYQbo)
Supplement: supplementary_material [file attachment]

|            |                      |                      |                      |                      |                      |                      |
|------------|----------------------|----------------------|----------------------|----------------------|----------------------|----------------------|
| airplane   | 1.154<br>$\pm 0.011$ | 0.994<br>$\pm 0.004$ | 0.955<br>$\pm 0.015$ | 0.966<br>$\pm 0.011$ | 0.964<br>$\pm 0.006$ | 0.967<br>$\pm 0.008$ |
| ship       | 0.802<br>$\pm 0.009$ | 1.03<br>$\pm 0.012$  | 0.915<br>$\pm 0.003$ | 0.918<br>$\pm 0.011$ | 0.985<br>$\pm 0.01$  | 0.988<br>$\pm 0.004$ |
| automobile | 0.808<br>$\pm 0.01$  | 0.779<br>$\pm 0.013$ | 0.777<br>$\pm 0.01$  | 0.714<br>$\pm 0.011$ | 1.003<br>$\pm 0.005$ | 0.987<br>$\pm 0.002$ |
| truck      | 0.886<br>$\pm 0.012$ | 0.852<br>$\pm 0.001$ | 0.801<br>$\pm 0.022$ | 0.749<br>$\pm 0.006$ | 0.996<br>$\pm 0.01$  | 0.975<br>$\pm 0.003$ |
| deer       | 0.971<br>$\pm 0.003$ | 0.997<br>$\pm 0.001$ | 1.015<br>$\pm 0.002$ | 1.009<br>$\pm 0.004$ | 1.078<br>$\pm 0.008$ | 0.934<br>$\pm 0.005$ |
| horse      | 0.993<br>$\pm 0.005$ | 1.021<br>$\pm 0.003$ | 1.017<br>$\pm 0.001$ | 1.009<br>$\pm 0.006$ | 0.827<br>$\pm 0.003$ | 1.037<br>$\pm 0.005$ |
|            | airplane             | ship                 | automobile           | truck                | deer                 | horse                |
