# Supplementary material
Source: ML conference proceedings conference paper supplement (https://openreview.net/forum?id=q4SiDyYQbo)
Supplement: supplementary_material [file attachment]

|            |                      |                      |                      |                      |                      |                      |
|------------|----------------------|----------------------|----------------------|----------------------|----------------------|----------------------|
| airplane   | 1.077<br>$\pm 0.013$ | 0.94<br>$\pm 0.01$   | 0.974<br>$\pm 0.01$  | 0.962<br>$\pm 0.008$ | 0.973<br>$\pm 0.007$ | 0.975<br>$\pm 0.007$ |
| ship       | 0.887<br>$\pm 0.008$ | 1.154<br>$\pm 0.013$ | 0.945<br>$\pm 0.008$ | 0.952<br>$\pm 0.011$ | 1.004<br>$\pm 0.006$ | 1.007<br>$\pm 0.007$ |
| automobile | 0.935<br>$\pm 0.006$ | 0.914<br>$\pm 0.011$ | 1.041<br>$\pm 0.01$  | 0.78<br>$\pm 0.009$  | 1.012<br>$\pm 0.008$ | 1.008<br>$\pm 0.009$ |
| truck      | 0.95<br>$\pm 0.013$  | 0.916<br>$\pm 0.013$ | 0.832<br>$\pm 0.012$ | 1.001<br>$\pm 0.016$ | 1.001<br>$\pm 0.008$ | 0.982<br>$\pm 0.009$ |
| deer       | 0.996<br>$\pm 0.008$ | 1.0<br>$\pm 0.008$   | 1.01<br>$\pm 0.009$  | 1.006<br>$\pm 0.006$ | 1.126<br>$\pm 0.012$ | 0.953<br>$\pm 0.009$ |
| horse      | 0.99<br>$\pm 0.008$  | 1.001<br>$\pm 0.009$ | 1.01<br>$\pm 0.01$   | 0.993<br>$\pm 0.009$ | 0.852<br>$\pm 0.008$ | 1.068<br>$\pm 0.009$ |
|            | airplane             | ship                 | automobile           | truck                | deer                 | horse                |
