# Supplementary material
Source: ML conference proceedings conference paper supplement (https://openreview.net/forum?id=q4SiDyYQbo)
Supplement: supplementary_material [file attachment]

|            | TE               |                 |                  |                 |                 |                  |                  |                  |                  |                  |
|------------|------------------|-----------------|------------------|-----------------|-----------------|------------------|------------------|------------------|------------------|------------------|
| airplane   | -0.946<br>±0.001 | 0.284<br>±0.001 | 0.033<br>±0.001  | 0.097<br>±0.001 | 0.415<br>±0.002 | 0.034<br>±0.001  | 0.012<br>±0.0    | 0.044<br>±0.001  | 0.008<br>±0.0    | 0.019<br>±0.0    |
| ship       | 0.641<br>±0.003  | -0.95<br>±0.0   | 0.108<br>±0.001  | 0.115<br>±0.001 | 0.012<br>±0.0   | 0.0<br>±0.0      | 0.006<br>±0.0    | 0.039<br>±0.0    | 0.008<br>±0.0    | 0.021<br>±0.0    |
| automobile | 0.081<br>±0.002  | 0.114<br>±0.001 | -0.963<br>±0.001 | 0.743<br>±0.001 | 0.001<br>±0.0   | 0.0<br>±0.0      | 0.0<br>±0.0      | 0.014<br>±0.0    | 0.001<br>±0.0    | 0.009<br>±0.0    |
| truck      | 0.06<br>±0.001   | 0.163<br>±0.001 | 0.676<br>±0.002  | -0.947<br>±0.0  | 0.006<br>±0.0   | 0.004<br>±0.0    | 0.016<br>±0.0    | 0.017<br>±0.001  | 0.004<br>±0.0    | 0.001<br>±0.0    |
| bird       | 0.177<br>±0.002  | 0.002<br>±0.0   | 0.0<br>±0.0      | 0.004<br>±0.0   | -0.804<br>±0.0  | 0.17<br>±0.002   | 0.039<br>±0.001  | 0.181<br>±0.001  | 0.063<br>±0.001  | 0.168<br>±0.002  |
| deer       | 0.031<br>±0.001  | 0.003<br>±0.0   | 0.0<br>±0.0      | 0.003<br>±0.0   | 0.343<br>±0.001 | -0.889<br>±0.001 | 0.212<br>±0.001  | 0.113<br>±0.003  | 0.12<br>±0.002   | 0.064<br>±0.001  |
| horse      | 0.063<br>±0.001  | 0.0<br>±0.0     | 0.002<br>±0.0    | 0.004<br>±0.0   | 0.031<br>±0.0   | 0.565<br>±0.001  | -0.929<br>±0.001 | 0.162<br>±0.001  | 0.094<br>±0.001  | 0.009<br>±0.0    |
| cat        | 0.023<br>±0.0    | 0.006<br>±0.0   | 0.006<br>±0.001  | 0.011<br>±0.0   | 0.082<br>±0.001 | 0.041<br>±0.0    | 0.021<br>±0.001  | -0.753<br>±0.002 | 0.402<br>±0.002  | 0.161<br>±0.001  |
| dog        | 0.007<br>±0.0    | -0.001<br>±0.0  | -0.001<br>±0.0   | -0.0<br>±0.0    | 0.057<br>±0.001 | 0.021<br>±0.001  | 0.051<br>±0.001  | 0.594<br>±0.001  | -0.756<br>±0.001 | 0.028<br>±0.0    |
| frog       | 0.019<br>±0.0    | 0.021<br>±0.0   | 0.004<br>±0.0    | -0.001<br>±0.0  | 0.425<br>±0.001 | 0.071<br>±0.001  | 0.002<br>±0.0    | 0.37<br>±0.002   | 0.014<br>±0.0    | -0.924<br>±0.001 |

| NIE              |                  |                  |                  |                  |                  |                  |                  |                  |                  |
|------------------|------------------|------------------|------------------|------------------|------------------|------------------|------------------|------------------|------------------|
| -0.208<br>±0.001 | 0.072<br>±0.001  | 0.01<br>±0.0     | 0.029<br>±0.001  | 0.049<br>±0.0    | 0.018<br>±0.001  | 0.005<br>±0.0    | 0.014<br>±0.0    | 0.003<br>±0.0    | 0.007<br>±0.0    |
| 0.111<br>±0.001  | -0.237<br>±0.001 | 0.036<br>±0.001  | 0.042<br>±0.001  | 0.008<br>±0.0    | 0.0<br>±0.0      | 0.004<br>±0.0    | 0.024<br>±0.0    | 0.004<br>±0.0    | 0.009<br>±0.0    |
| 0.023<br>±0.001  | 0.032<br>±0.0    | -0.208<br>±0.003 | 0.145<br>±0.002  | 0.001<br>±0.0    | 0.0<br>±0.0      | 0.0<br>±0.0      | 0.002<br>±0.0    | 0.0<br>±0.0      | 0.005<br>±0.0    |
| 0.025<br>±0.001  | 0.014<br>±0.0    | 0.061<br>±0.002  | -0.121<br>±0.001 | 0.006<br>±0.0    | 0.0<br>±0.0      | 0.006<br>±0.0    | 0.005<br>±0.0    | 0.002<br>±0.0    | 0.003<br>±0.0    |
| 0.056<br>±0.001  | 0.001<br>±0.0    | 0.0<br>±0.0      | 0.004<br>±0.0    | -0.274<br>±0.002 | 0.067<br>±0.001  | 0.022<br>±0.001  | 0.053<br>±0.001  | 0.028<br>±0.001  | 0.043<br>±0.001  |
| 0.026<br>±0.001  | 0.002<br>±0.0    | 0.0<br>±0.0      | -0.0<br>±0.0     | 0.033<br>±0.001  | -0.217<br>±0.001 | 0.075<br>±0.0    | 0.023<br>±0.001  | 0.027<br>±0.001  | 0.031<br>±0.0    |
| 0.006<br>±0.0    | 0.0<br>±0.0      | 0.0<br>±0.0      | 0.004<br>±0.0    | 0.014<br>±0.0    | 0.039<br>±0.001  | -0.129<br>±0.003 | 0.049<br>±0.0    | 0.011<br>±0.001  | 0.005<br>±0.0    |
| 0.011<br>±0.0    | 0.003<br>±0.0    | 0.005<br>±0.0    | 0.009<br>±0.0    | 0.031<br>±0.001  | 0.012<br>±0.0    | 0.005<br>±0.0    | -0.201<br>±0.003 | 0.073<br>±0.002  | 0.053<br>±0.001  |
| 0.007<br>±0.0    | -0.001<br>±0.0   | -0.001<br>±0.0   | -0.0<br>±0.0     | 0.025<br>±0.001  | 0.013<br>±0.001  | 0.011<br>±0.001  | 0.018<br>±0.001  | -0.091<br>±0.002 | 0.019<br>±0.001  |
| 0.012<br>±0.0    | 0.016<br>±0.0    | 0.003<br>±0.0    | 0.0<br>±0.0      | 0.021<br>±0.002  | 0.025<br>±0.0    | 0.002<br>±0.0    | 0.082<br>±0.0    | 0.004<br>±0.0    | -0.164<br>±0.002 |
| airplane         | ship             | automobile       | truck            | bird             | deer             | horse            | cat              | dog              | frog             |
