# Supplementary material
Source: ML conference proceedings conference paper supplement (https://openreview.net/forum?id=q4SiDyYQbo)

connectivity ( $\alpha_{i,j}$ )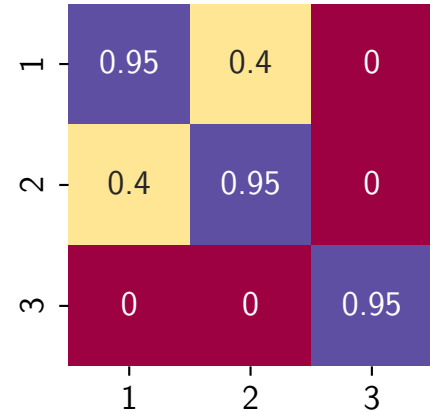 $n = (2^6, 2^6, 2^6)$ 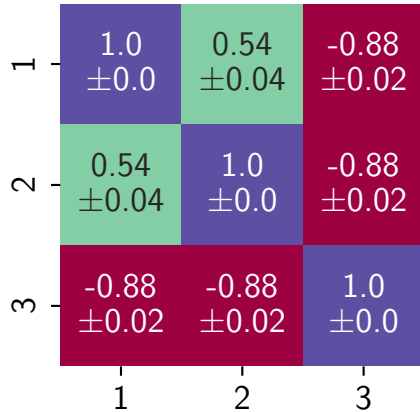 $n = (2^4, 2^6, 2^6)$ 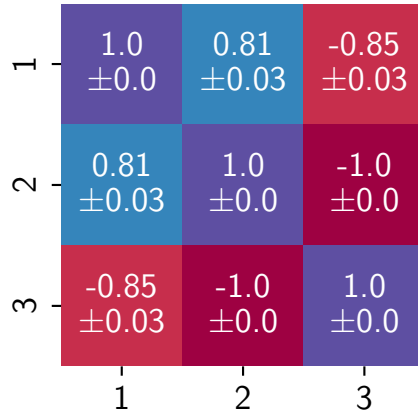 $n = (2^2, 2^6, 2^6)$ 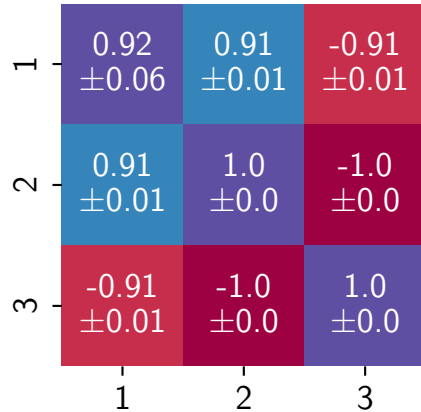

Supplement: supplementary_material [file attachment]

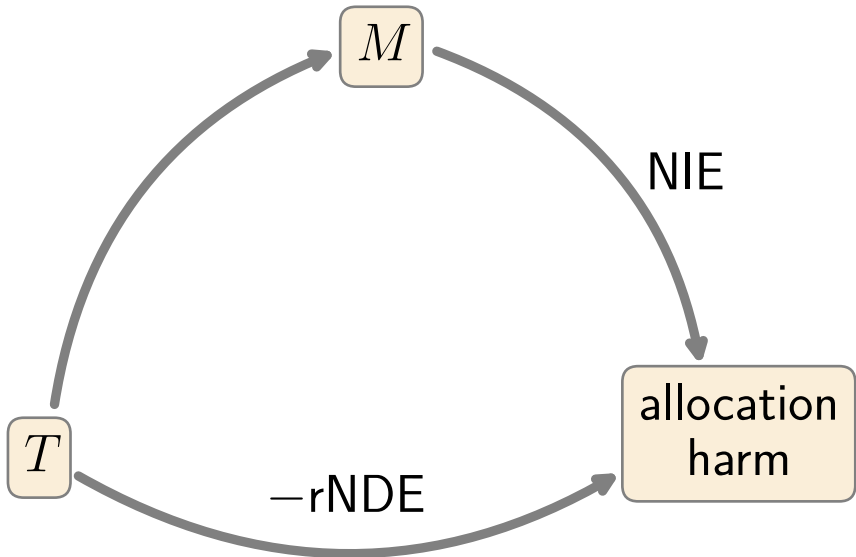

Supplement: supplementary_material [file attachment]

connectivity ( $\alpha_{i,j}$ )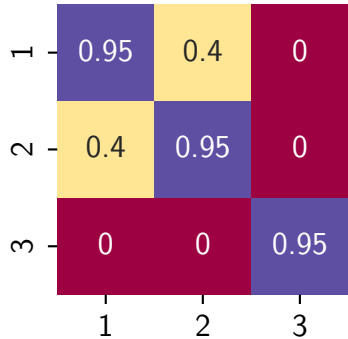 $\pi_1 = 2^{-2}$ 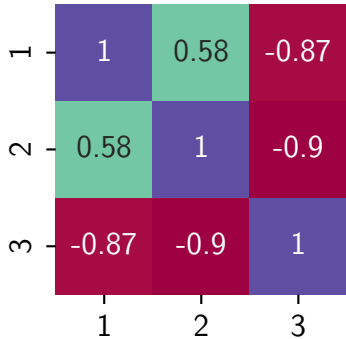 $\pi_1 = 2^{-4}$ 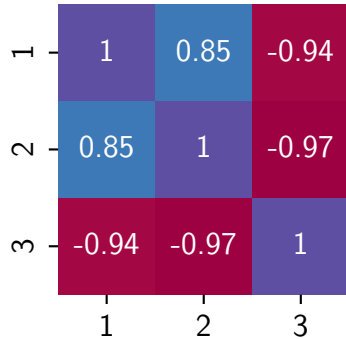 $\pi_1 = 2^{-6}$ 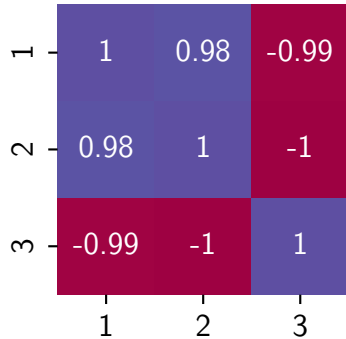

Supplement: supplementary_material [file attachment]

TE

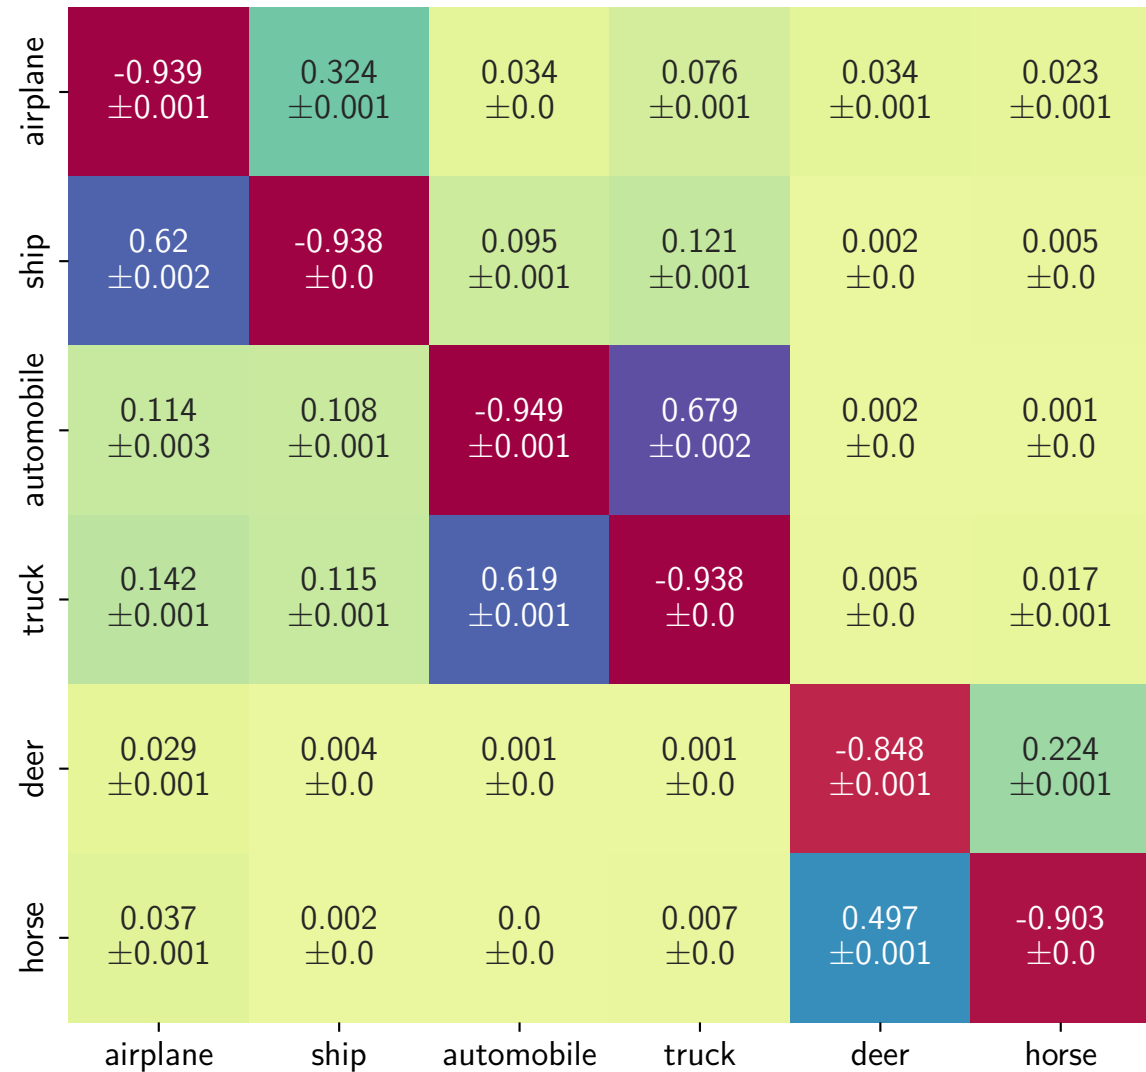

NIE

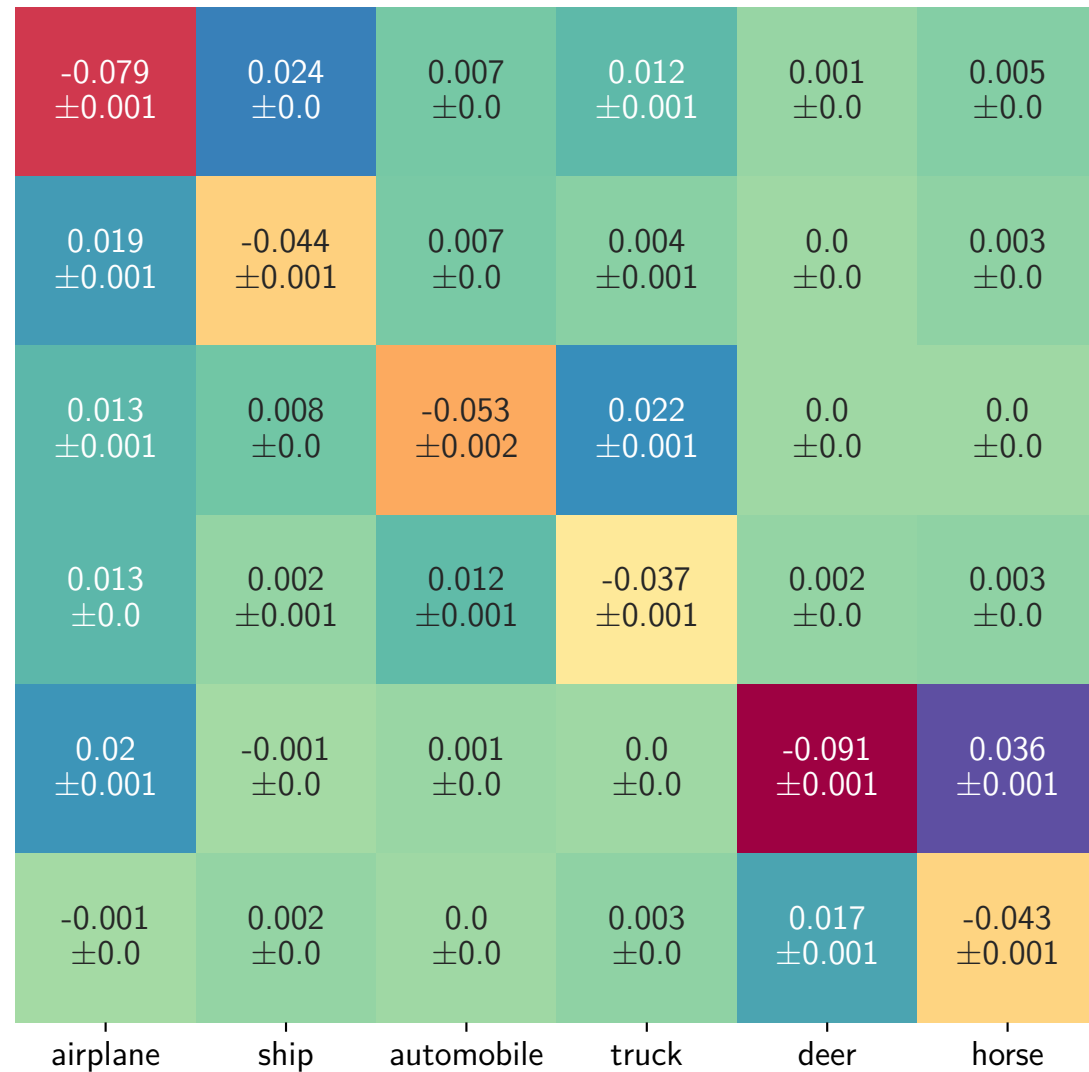

Supplement: supplementary_material [file attachment]
